# Supplementary material
Source: PubMed Central journal article supplement (PMC7540089)
Supplement: ajtr0012-5465-f7.pdf [file ajtr0012-5465-f7.pdf]

## A positive feedback loop of AKR1B10P1/miR-138/SOX4 in HCC

**Table S1.** The primers for RT-qPCR assay

| Genes               | Forward                       | Reverse                     |
|---------------------|-------------------------------|-----------------------------|
| AKR1B10P1           | 5'-GGTAATATGATCGGTGAAAAGCA-3' | 5'-TAGGGGGCTGTAGGCCATAAT-3' |
| SOX4                | 5'-GCACTAGGACGTCTGCCTTT-3'    | 5'-ACACGGCATATTGCACAGGA-3'  |
| miR-138             | 5'-AACGGAGCTGGTGTGTGAATC-3'   | 5'-GTGCAGGGTCCGAGGT-3'      |
| ChIP assay Primer-1 | 5'-TGGGATGCAGCTAAAGCAGT-3'    | 5'-CTGCTGTGTCCAGAGTTGGT-3'  |
| ChIP assay Primer-2 | 5'-GAGGCAGGAGCAAAACAAAGC-3'   | 5'-TGGTGCAGACCTAGGAGTCA-3'  |

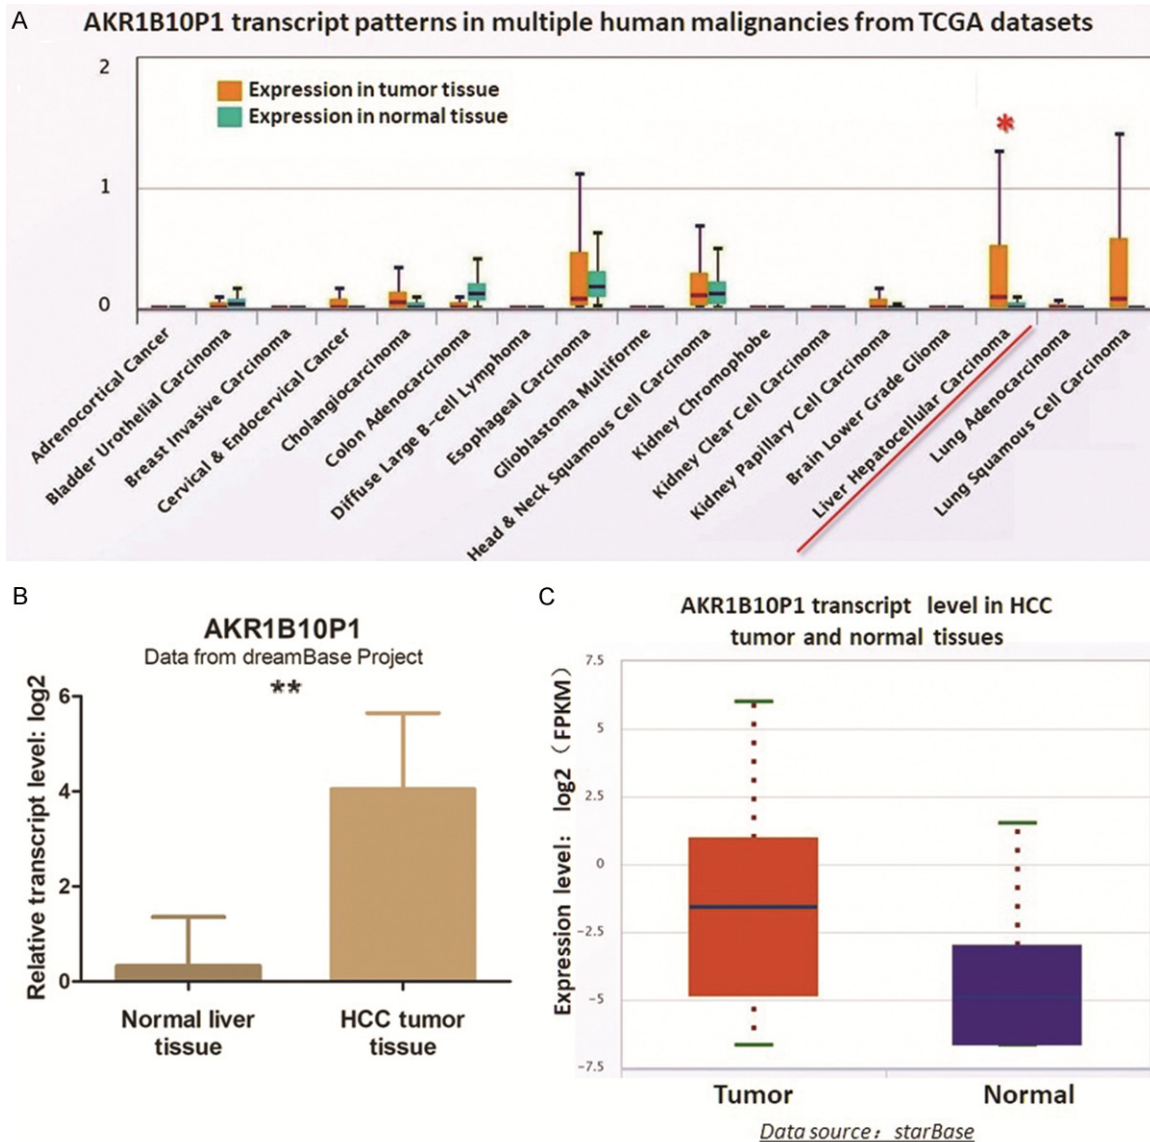

**Figure S1.** AKR1B10P1 expression profile from the databases. A. According to the analysis of TCGA database, pseudogene AKR1B10P1 presents detectable transcript products in normal liver tissues and cells in multiple human malignancies ( $*P < 0.05$ ). B. According to the datasets from dreamBase Project database, AKR1B10P presents extremely low transcription in normal liver tissues, but was transcribed in HCC tumor tissues ( $**P < 0.01$ ). C. According to the starBase database, AKR1B10P1 was transcribed in HCC tissues ( $P=1.0e-7$ ).

A positive feedback loop of AKR1B10P1/miR-138/SOX4 in HCC

A

SOX4 expression: Tumor tissue > Non cancerous tissue (×400)

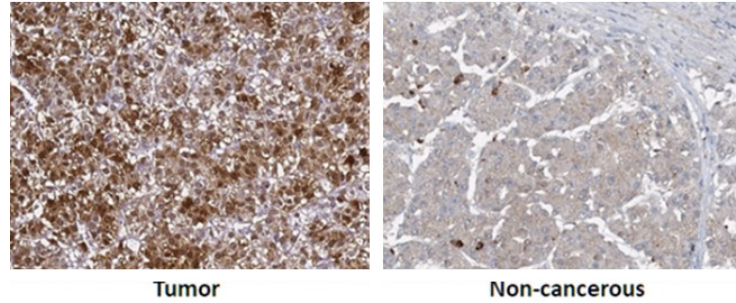

IHC assay staining by IgG antibody as control (×400)

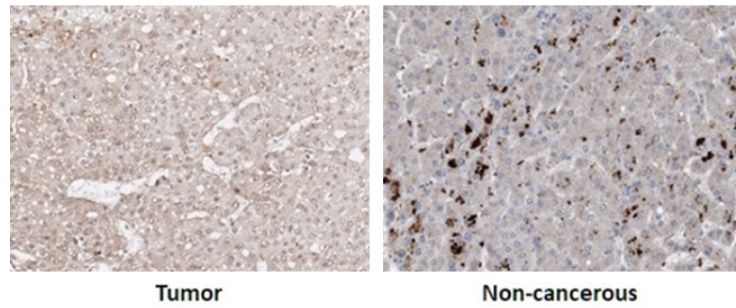

B

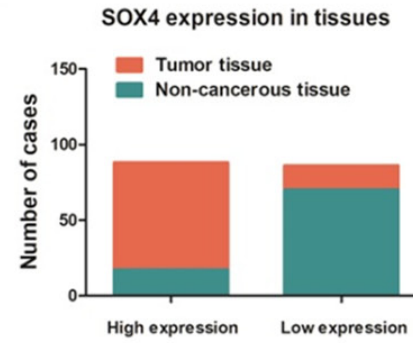

C

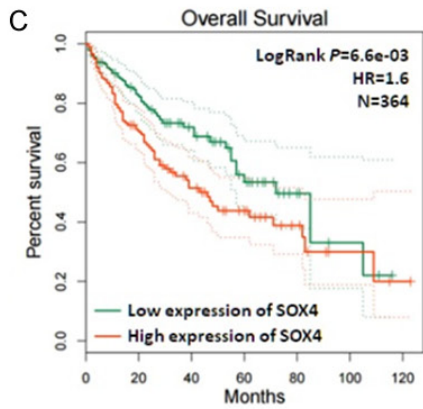

D

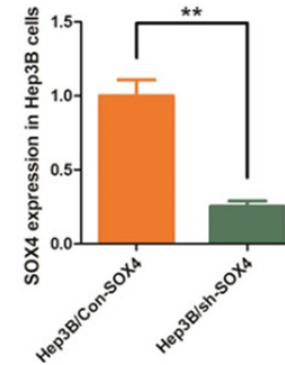

E

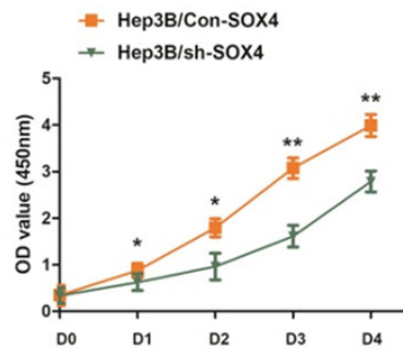

F

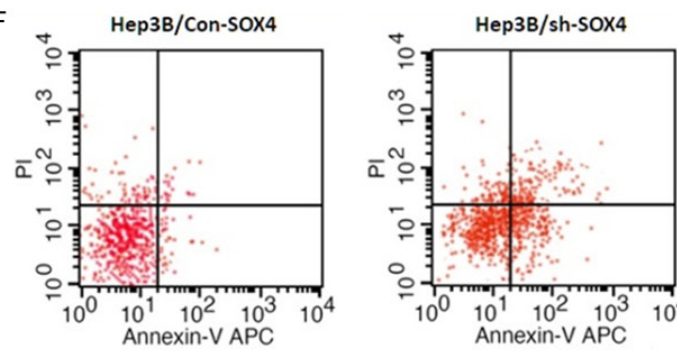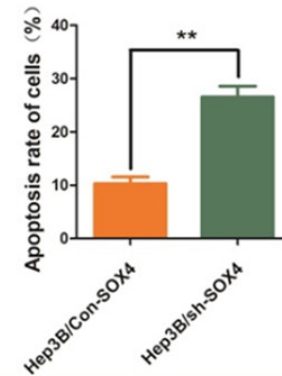

## A positive feedback loop of AKR1B10P1/miR-138/SOX4 in HCC

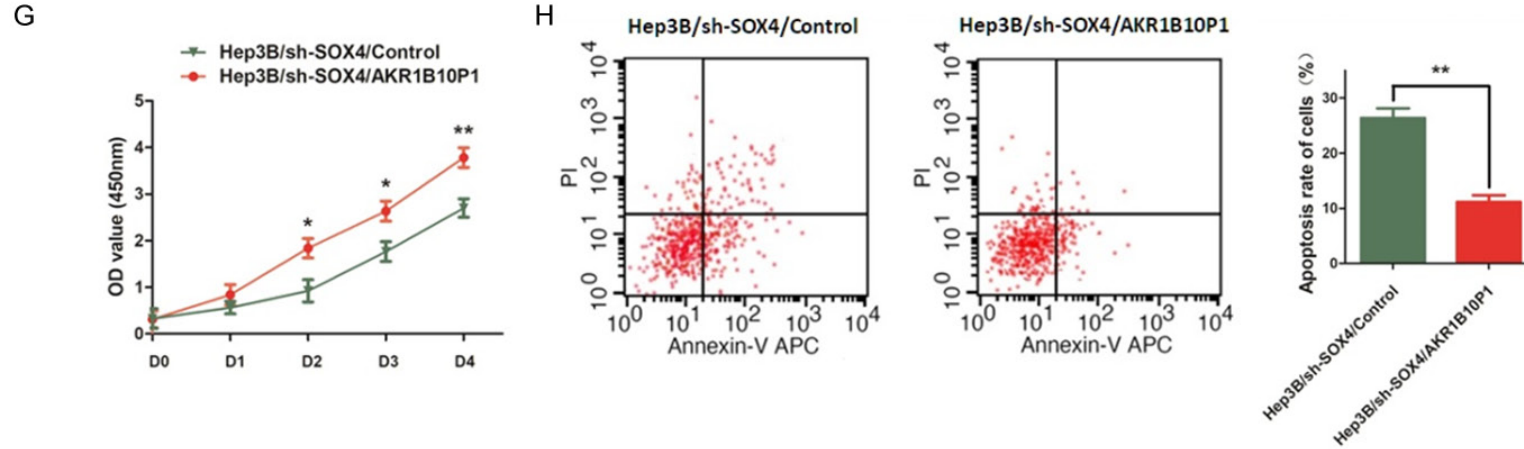

**Figure S2.** SOX4 expression profile and the impact on cell proliferation in HCC. A. Representative graph of immunohistochemistry analysis (400 $\times$ ) of the HCC cases. Specimens stained IgG anti-body were regarded as control. SOX4 expression in tumor specimens was significantly higher than in adjacent non-cancerous tissues. B. Statistic of number of cases with higher or lower expression of SOX4 in specimens. SOX4 was up-regulated in most of the tumor tissues (74/93), and was expressed at a lower level in most of the adjacent non-cancerous tissues (17/93) ( $P < 0.01$ ). C. Overall survival (OS) analysis according to GC patients' follow-up information was conducted and presented by Kaplan-Meier plot. High SOX4 level in HCC tissue is correlated poor OS (364 cases,  $P=6.63 \times 10^{-3}$ ). D. SOX4 was knocked-down in Hep3B cells by using shRNA transfection. RT-qPCR assay was used for validating the transfection effect. SOX4 was significantly detected ( $**P < 0.01$ ). E. The CCK8 assay showed a significant inhibition of cell proliferation by knocking-down SOX4 ( $*P < 0.01$ ,  $**P < 0.01$ ). F. The representative histograms describing cell apoptosis status was generated according to the result from the flow cytometry detection. The apoptosis rate of Hep3B cells was significantly increased from 10.28% to 26.54% ( $**P < 0.01$ ) through knocking-down AKR1B10P1. The results are means of three independent experiments  $\pm$  SD. ( $**P < 0.01$ ). G. According to the CCK8 assay result, re-introducing AKR1B10P1 significantly promoted cell proliferation in Hep3B cells knocked down SOX4 ( $*P < 0.01$ ,  $**P < 0.01$ ). H. Re-introducing AKR1B10P1 significantly rescued the increase of Hep3B cell apoptosis induced by knocking down SOX4 from 26.39% to 11.12% ( $**P < 0.01$ ).

**Table S2.** Selected sequence of the predicted miR-138 binding site of AKR1B10P1 transcript and the 3'-UTR of SOX4 mRNA, along with the relative mutated sequence

| Genes                | Sequence including the binding site (202 bp)                                                                                                                                                            | Relative mutated sequence                                                                                                                                                                                   |
|----------------------|---------------------------------------------------------------------------------------------------------------------------------------------------------------------------------------------------------|-------------------------------------------------------------------------------------------------------------------------------------------------------------------------------------------------------------|
| AKR1B10P1 transcript | 5'-agattaaggagattgctgcaaggcacaacacacagccaggttctgatccattccatatacagaggaatgtgactgtgatccccaagtctgtgacaccgacgcattgttgagaacattcaggcctttgactttacattgaatgatgaggagatggcaacacactcagcttcaacagaaactggaggcccgtaac-3' | 5'-acaattacgtgttaggtcctacggaaatataatcagaccgctgtacagttgcttatgctttgctgtcatttcagttctcaacgcatgacagagtggtgctggcccttagatcacatcttactcctcattcagatattcttagtaagttcacgtgttcggatcgagagtgaccatgatctgtatcagcaccgacctag-3' |
| 3'-UTR of SOX4 mRNA  | 5'-agatttctgtataagactgttgagcagttttaaaatagtgtaggataataaaaaagcagatagatggcctatgttgattcctcaacgaaattatcaccagcttttttcttcttaactcttaaggattcaaacgcaactcaaatctgtgctggacttaaaaaaacaattcaggaccaaattttctcagtggtg-3'  | 5'-acaatacagtaaatgtgatcacctgatataatattgagaacgtttaaataatatacctgtttcggggtttctacaatgcaagatccataattgtgctgtatataatgtaatacacaataatcgttactatccctagtgataacagagtcgtcataatataatgattactcagctattatatacactgagagag-3'     |
